# Supplementary material for: An ultrasensitive and simple fluorescence biosensor for detection of the Kras wild type by using the three-way DNA junction-driven catalyzed hairpin assembly strategy
Source: Royal Society of Chemistry journal article supplement (doi:10.1039/c9an00195f), 2019-01-01
Supplement: c9an00195f1.pdf [file c9an00195f1.pdf]

**Ultrasensitive and simple fluorescence biosensor for detection of the  
*Kras* gene by using the three-way DNA junction-driven catalyzed  
hairpin assembly strategy**

**Qiong Li,<sup>a,b</sup> Danhua Zhou,<sup>b</sup> Jiafeng Pan,<sup>b</sup> Zhi Liu,<sup>a</sup> and Junhua Chen<sup>b\*</sup>**

<sup>a</sup>College of Bioscience and Biotechnology, Hunan Agricultural University, Changsha 410128, China.

<sup>b</sup>Guangdong Key Laboratory of Integrated Agro-environmental Pollution Control and Management, Guangdong Institute of Eco-Environmental and Science & Technology, Guangzhou 510650, China.

**\*Corresponding author**

**E-mail: 222chenjunhua@163.com; jhchen@soil.gd.cn.**

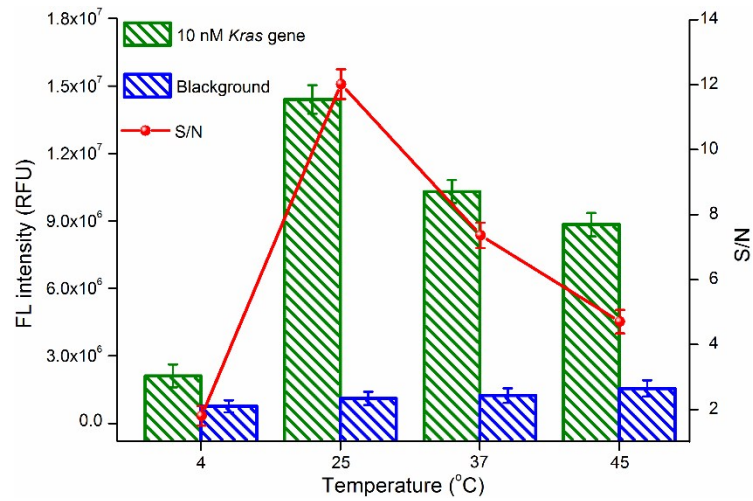

Fig. S1 Effect of the reaction temperature on the response of the sensing system. The histograms represent the fluorescence intensity of the solution in the presence of 10 nM *Kras* gene (green) and in the absence of the *Kras* gene (blue), respectively. The red line represents the S/N ratio. The corresponding error bars represent the standard deviation of three independent measurements obtained at each reaction temperature.

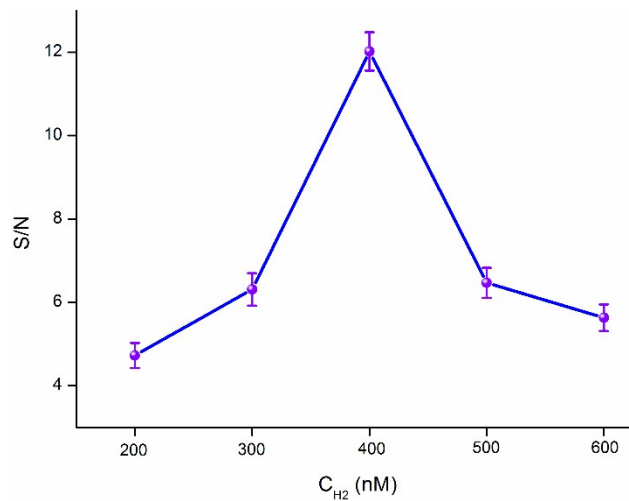

Fig. S2 Effect of the H<sub>2</sub> concentration on the performance of the sensing system. The *Kras* gene concentration is 10 nM. Reactions were performed at 25 °C.

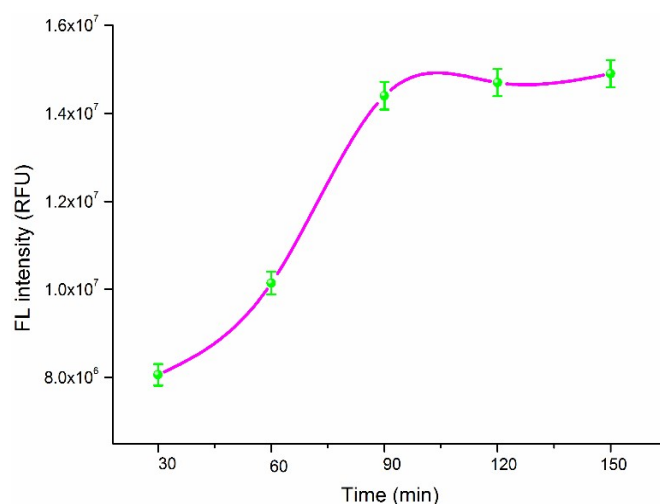

Figure. S3 Effect of the reaction time of the signal amplification on the fluorescence intensity of the proposed method for the detection of the *Kras* gene (10 nM). Incubation temperature and H2 concentration were 25 °C and 400 nM, respectively.

Table. S1 Comparison of the analytical methods capable of sensing the *Kras* gene

| Method                                                                       | Linear range  | Detection Limit | References |
|------------------------------------------------------------------------------|---------------|-----------------|------------|
| Electrochemical biosensor based on clamp assay                               | 168 fM–168 pM | 168 fM          | 1          |
| Electrochemical biosensor based on functional composite nanofibers           | 100 fM–100 pM | 30 fM           | 2          |
| Colorimetry biosensor base on enzyme-amplified ligation on magnetic beads    | 50 pM–20 nM   | 30 pM           | 3          |
| Colorimetry biosensor base on chain anadiplosis-structured DNA nanowires     | 100 fM–100 nM | 100 fM          | 4          |
| Fluorescence biosensor base on loopback rolling circle                       | 100 fM–20 nM  | 16 fM           | 5          |
| Fluorescence biosensor base on double-hairpin molecular-beacon               | 50 pM–20 nM   | 50 pM           | 6          |
| Fluorescence biosensor base on toehold mediated strand displacement reaction | 2 pM–10 nM    | 1.8 pM          | 7          |
| Fluorescence biosensor base on CHA                                           | 10 fM–100 nM  | 2.7 fM          | This work  |

## References

- 1 J. Das, I. Ivanov, L. Montermini, J. Rak, E. H. Sargent and S. O. Kelley, *Nat. Chem.*, 2015, **7**, 569-575.
- 2 X. Wang, G. Shu, C. Gao, Y. Yang, Q. Xu and M. Tang, *Anal. Biochem.*, 2014, **466**, 51-58.
- 3 X. Chen, A. Ying and Z. Gao, *Biosens. Bioelectron.*, 2012, **36**, 89-94.
- 4 J. Xu, Z. Wu, Y. Chen, T. Zheng, J. Le and L. Jia, *Analyst.*, 2017, **142**, 613-620.
- 5 H. Xu, D. Wu, Y. Jiang, R. Zhang, Q. Wu, Y. Liu and Z. Wu, *Talanta.*, 2017, **164**, 511-517.
- 6 H. Xu, R. Zhang, F. Li, Y. Zho, T. Peng, X. Wang and Z. Shen, *Anal. Bioanal. chem.*, 2016, **408**, 6181-6188.
- 7 J. Zhu, Y. Ding, X. Liu, L. Wang and W. Jiang, *Biosens. Bioelectron.*, 2014, **59**, 276-281.
